# Supplementary material
Source: publisher site journal article supplement (https://www.dovepress.com/get_supplementary_file.php?f=409147.docx)
Supplement: Supplementary file 1 [file get_supplementary_file.php]

**Table S1**: Baseline demographics and clinical characteristics in 211 PLWH.

| Characteristics | Value |
| --- | --- |
| Age (yr), n (%) | |
| 20-30 | 59 (28.0) |
| 31-40 | 87 (41.2） |
| 41-50 | 30 (14.2) |
| >50 | 35 (16.6) |
| Sex, n (%) | |
| Male | 204 (96.7) |
| Female | 7 (3.3) |
| Education, n (%) | |
| 1 | 7 (3.3) |
| 2 | 53 (25.1) |
| 3 | 45 (21.3) |
| 4 | 92 (43.6) |
| 5 | 14 (6.6) |
| Marital status, n (%) | |
| Married | 62 (29.4) |
| Unmarried | 132 (62.6) |
| Divorced/separated | 17 (8.1) |
| Residence, n (%) | |
| City | 130 (61.6) |
| Countryside | 81 (38.4) |
| Household type, n (%) | |
| Inside the province | 132 (62.6) |
| Outside the province | 79 (37.4) |
| BMI | 21.95±3.52 |
| Hypertension, n (%) | |
| No | 155 (73.5) |
| Yes | 56 (26.5) |
| Sexual transmission route, n (%) | |
| Homosexual/bisexual | 162 (76.8) |
| Heterosexual | 46 (21.8) |
| Others | 3 (1.4) |
| Time of therapy initiated (yr) | 4.2 (2.0,7.0) |

Note: BMI, body mass index.

**Table S2**: Differences between baseline (T1) and post-2nd vaccination (T2) on CD4+ T cells and Tregs subpopulations in 211 PLWH.

| Variates (n = 211) | T1 | T2 | *P* value |
| --- | --- | --- | --- |
| CD4+ T-cells count (cells/μL) | 273.0  (176.0, 381.0) | 392.0  (250.0, 542.0) | < 0.001 |
| CD4+CD25HighCD127Low Tregs count (cells/μL) | 17.2  (10.7, 24.8) | 24.1  (17.3, 35.8) | < 0.001 |
| CD4+CD25HighCD127Low Tregs frequency (%) | 6.4  (5.5, 7.9) | 6.8  (5.6, 8.0) | 0.259 |
| CD45RA+ rTregs  count (cells/μL) | 3.5 (1.8, 6.1) | 4.6 (2.2, 8.1) | < 0.001 |
| CD45RA+ rTregs  frequency (%) | 1.4 (0.8, 1.9) | 1.2 (0.8, 1.9) | 0.197 |
| CD45RO+ eTregs  count (cells/μL) | 10.4 (6.2, 15.0) | 12.8 (9.2, 17.6) | < 0.001 |
| CD45RO+ eTregs  frequency (%) | 3.9 (2.9, 5.2) | 3.4 (2.8, 4.4) | 0.003 |
| eTregs/rTregs ratio | 2.8 (1.8, 5.7) | 2.9 (1.8, 5.4) | 0.886 |

Note: T1: pre-vaccination baseline, T2: post-2nd vaccination, Tregs: regulated T cells, rTregs: resting Tregs; eTregs: effector Tregs.

**Table S3**: Dynamic changes in CD4+ T cells and Tregs subpopulations at three time points for cohort 1 (n = 66, intervals of 3 months).

| Variates | T1 | T3 | T6 |
| --- | --- | --- | --- |
| CD4+ T-cells count  (cells/μL) | 269.0  (171.3, 378.8) | 405.5  (294.3, 542.8) | 385.0  (247.0, 529.3) |
| CD4+ CD25HighCD127Low Tregs count (cells/μL) | 16.5  (10.5, 23.4) | 32.3  (19.0, 39.0) | 23.7  (18.6, 36.4) |
| CD4+ CD25HighCD127Low Tregs frequency (%) | 6.3 (5.3, 7.8) | 7.2 (6.3, 8.6) | 6.8 (5.5, 8.9) |
| CD45RA+ rTregs  count (cells/μL) | 3.6 (1.6, 6.4) | 7.5 (2.8, 10.4) | 4.0 (1.7, 6.8) |
| CD45RA+ rTregs  frequency (%) | 1.3 (0.7, 2.0) | 1.6 (0.8, 2.1) | 1.1 (0.6, 1.5) |
| CD45RO+ eTregs  count (cells/μL) | 8.2  (6.1, 13.7) | 15.3  (10.9, 19.8) | 9.0  (7.5, 14.1) |
| CD45RO+ eTregs  frequency (%) | 3.7 (2.7, 5.1) | 3.5 (3.0, 4.5) | 3.0 (1.9, 3.8) |
| eTregs/rTregs ratio | 2.8 (1.6, 4.8) | 2.5 (1.4, 4.6) | 2.6 (1.6, 4.8) |

Note: T1: pre-vaccination baseline, T3: 3 months after the second vaccination, T6: 2 months after the third vaccination, Tregs: regulated T cells, rTregs: resting Tregs; eTregs: effector Tregs.

**Table S4**: Dynamic changes in CD4+ T cells and Tregs subpopulations at three time points for cohort 2 (n = 99, intervals of 5 months).

| Variates | T1 | T4 | T5 |
| --- | --- | --- | --- |
| CD4+ T-cells count  (cells/μL) | 295.0  (197.0, 412.0) | 460.0  (314.0, 642.0) | 515.0  (377.0, 716.0) |
| CD4+ CD25HighCD127Low Tregs count (cells/μL) | 19.8  (12.3, 24.9) | 30.7  (24.2, 41.5) | 33.3  (25.1, 45.0) |
| CD4+ CD25HighCD127Low Tregs frequency (%) | 6.4 (5.4, 8.1) | 7.1 (5.7, 8.5) | 6.1 (5.1, 7.4) |
| CD45RA+ rTregs  count (cells/μL) | 3.5 (1.9, 6.1) | 5.1 (3.0, 8.6) | 5.9 (3.1, 9.2) |
| CD45RA+ rTregs  frequency (%) | 1.3 (0.8, 1.8) | 1.2 (0.7, 1.6) | 1.2 (0.6, 1.7) |
| CD45RO+ eTregs  count (cells/μL) | 11.5  (8.5, 16.5) | 11.7  (8.6, 15.9) | 12.9  (9.5, 17.7) |
| CD45RO+ eTregs  frequency (%) | 4.3 (3.0, 5.5) | 2.7 (1.9, 3.6) | 2.4 (1.9, 3.2) |
| eTregs/rTregs ratio | 2.9 (2.1, 6.1) | 2.4 (1.4, 4.5) | 2.2 (1.5, 3.9) |

Note: T1: pre-vaccination baseline, T4: 5 months after the second vaccination, T5: one month after the third vaccination, Tregs: regulated T cells, rTregs: resting Tregs; eTregs: effector Tregs.
